# Supplementary material for: Evolutionary History and Genome Organization of DUF1220 Protein Domains
Source: PubMed Central journal article supplement (PMC3429928; doi:10.1534/g3.112.003061), 2012-09-01
Supplement: supp_2.9.977_003061SI.pdf [file supp_2.9.977_003061SI.pdf]

A

```

Human      EKDQAGLEPLALR-LSRELQEKEKVIQAKLDA---RSLTPSSSHALS-DSHRSPSST 55
Opossum    MDDQSSHELLALR-LSKELQEKEKVIQAKLNA---RSLTPSSSHALS-DSHRSPSST 55
Chicken    GEDKSSHELLALR-LSRELQEKEKVIQAKLQE---RCESPGSSRPPS-ESSRSATST 55
Lizard     TEDKSSHEVLALR-LSKELEEKQLIKTLQAKLHV---HSVSPSSNHSMS-ESSRSGSST 55
Frog       VDDKSRHELLAIR-LSKELQQKDKIIESLQSKLEG---RSLTPSSSHAIS-ESDQS-DRT 54
Zebrafish  PDDKSGHELLAIRRLSKELQQKDKLIESLRKLDQQQPRSDTPTSSHAFSVATDQS-DRT 59
          .*: : * **:* **:*:***:***:***: *.:** . : . : * : . : * : : * *

```

  

```

Human      SFLSDELEACS-DMDIV 71
Opossum    SFLSEDMEGSS-DMDVA 71
Chicken    SFVSDVLEPCS-DGEAA 71
Lizard     SFLSDGLEGCS-DMEDT 71
Frog       SFVSDQLSNDDLDG- 70
Zebrafish  SFVSDHGSTNEDLELC 76
          **: **: . * :

```

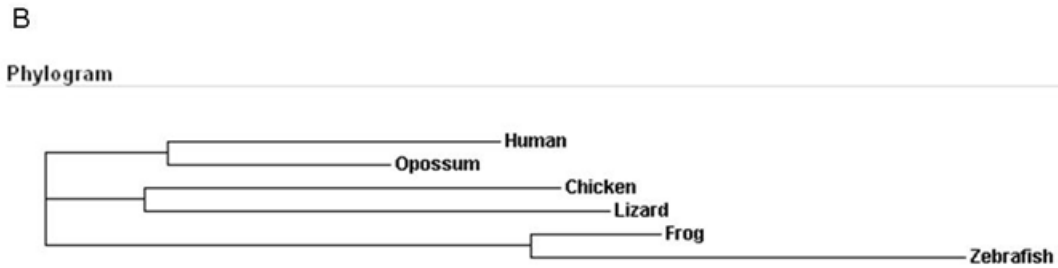

**Figure S1** Evolution of DUF1220 domain precursor in PDE4DIP. (A) A sequence alignment performed with ClustalW of the DUF1220 protein domain homologous region in PDE4DIP in human, opossum, chicken, lizard, frog, and zebrafish. Only the region in human and opossum are conserved enough to meet criteria for being called a DUF1220 domain. However, there are several highly conserved amino acids and what appears to be a general progression in amino acid changes that show the eventual formation of the DUF1220 protein domain, as it is currently recognized. (B) Phylogenetic profile created by ClustalW of the sequence alignment shown in 2A. The phylogeny mirrors the known evolutionary relationships of these species, suggesting that the DUF1220 domain evolved over time from a precursor region in non-mammalian vertebrates prior to the appearance of the mammalian order.

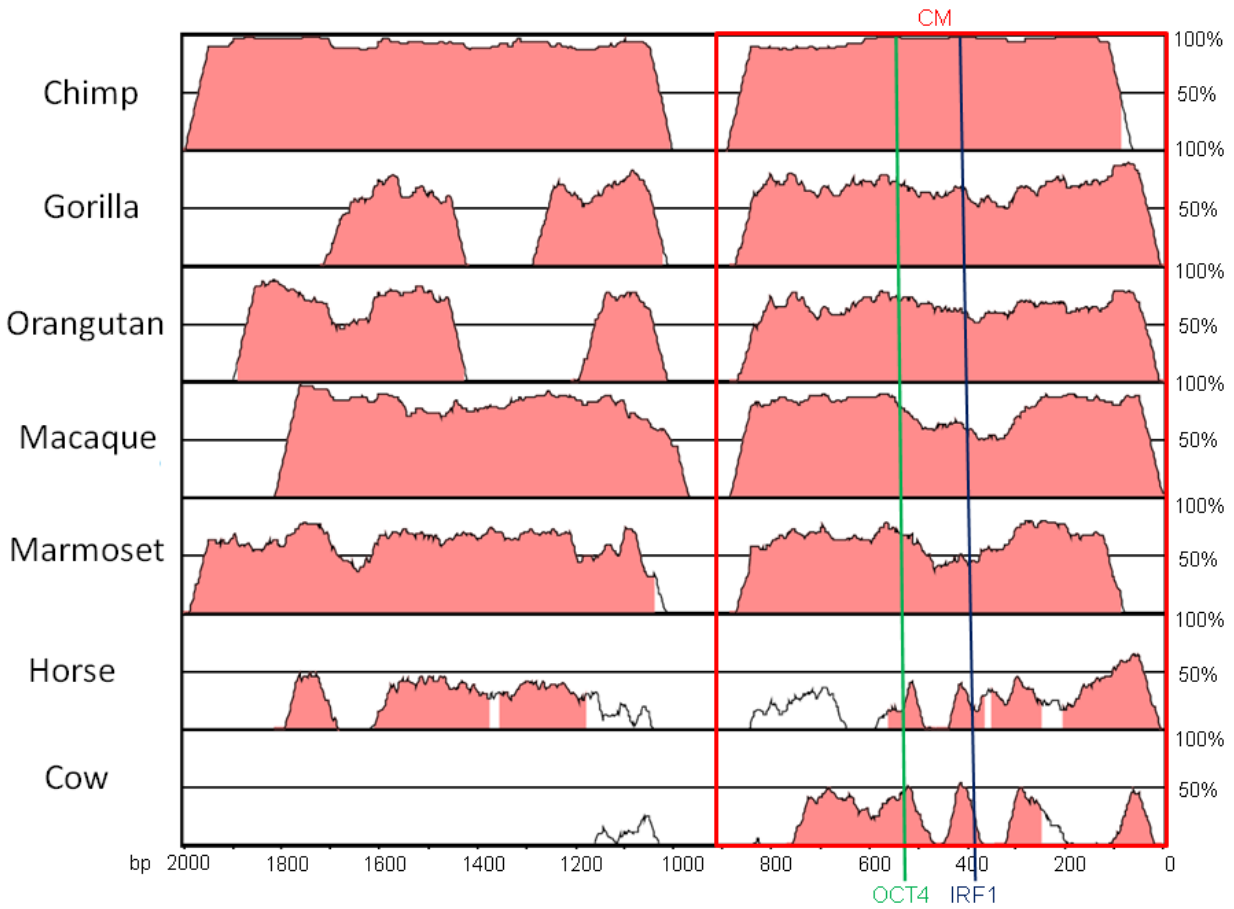

**Figure S2** Global alignment of a region 2000 bp upstream of predicted *NBPF* genes. The upstream regions of predicted *NBPF* genes in 8 species were aligned to the 2000 bp upstream of human *NBPF4* using the VISTA multiple alignment tool. The CM promoter is boxed in red with the two conserved transcription factor binding sites marked in green and dark blue.

**Table S1 Comparison of characteristics within the six primate DUF1220 clades**

| Clades | Approximate Appearance (mya) | % Clade Human | Copies per Gene | Copies in Human Genome | Placement of DUF1220 within NBPF Gene | Primary Mech. Clade Emergence |
|--------|------------------------------|---------------|-----------------|------------------------|---------------------------------------|-------------------------------|
| CON1   | >90                          | 44            | 1-3             | 36                     | N-terminal                            | Gene Dup                      |
| CON2   | >90                          | 32            | 1               | 20                     | Next to CON1                          | Gene Dup                      |
| CON3   | >40                          | 27            | 0-1             | 15                     | C-terminal                            | Gene Dup                      |
| HLS1   | 25-40                        | 72            | 0-14            | 61                     | Between CON2 & CON3                   | Domain Dup                    |
| HLS2   | 25-40                        | 66            | 0-17            | 71                     | Between CON2 & CON3                   | Domain Dup                    |
| HLS3   | 25-40                        | 62            | 0-17            | 67                     | Between CON2 & CON3                   | Domain Dup                    |

**Table S2** Correspondence of each superclade in the DUF1220 evolutionary phylogeny with the 10 Pfam DUF1220 seed domains.

| Pfam Seed Domain | Superclade |
|------------------|------------|
| Q8IX62 111-177   | HLS1       |
| Q8IX62 186-252   | HLS2       |
| Q8ND86 36-102    | HLS2       |
| Q8IX62 17-83     | HLS3       |
| Q9C0H0 138-201   | CON1       |
| Q9H094 236-298   | CON1       |
| Q8IX77 116-178   | CON1       |
| Q8IX71 95-158    | CON2       |
| 095877 28-94     | CON3       |
| Q8ND86 186-252   | CON3       |
