# Supplementary material for: Evolutionary History and Genome Organization of DUF1220 Protein Domains
Source: PubMed Central journal article supplement (PMC3429928; doi:10.1534/g3.112.003061), 2012-09-01
Supplement: supp_2.9.977_TableS1.pdf [file supp_2.9.977_TableS1.pdf]

**Table S1 Comparison of characteristics within the six primate DUF1220 clades**

| Clades | Approximate Appearance (mya) | % Clade Human | Copies per Gene | Copies in Human Genome | Placement of DUF1220 within NBPF Gene | Primary Mech. Clade Emergence |
|--------|------------------------------|---------------|-----------------|------------------------|---------------------------------------|-------------------------------|
| CON1   | >90                          | 44            | 1-3             | 36                     | N-terminal                            | Gene Dup                      |
| CON2   | >90                          | 32            | 1               | 20                     | Next to CON1                          | Gene Dup                      |
| CON3   | >40                          | 27            | 0-1             | 15                     | C-terminal                            | Gene Dup                      |
| HLS1   | 25-40                        | 72            | 0-14            | 61                     | Between CON2 & CON3                   | Domain Dup                    |
| HLS2   | 25-40                        | 66            | 0-17            | 71                     | Between CON2 & CON3                   | Domain Dup                    |
| HLS3   | 25-40                        | 62            | 0-17            | 67                     | Between CON2 & CON3                   | Domain Dup                    |
