# Supplementary material for: Evolutionary History and Genome Organization of DUF1220 Protein Domains
Source: PubMed Central journal article supplement (PMC3429928; doi:10.1534/g3.112.003061), 2012-09-01
Supplement: supp_2.9.977_TableS2.pdf [file supp_2.9.977_TableS2.pdf]

**Table S2** Correspondence of each superclade in the DUF1220 evolutionary phylogeny with the 10 Pfam DUF1220 seed domains.

| Pfam Seed Domain | Superclade |
|------------------|------------|
| Q8IX62 111-177   | HLS1       |
| Q8IX62 186-252   | HLS2       |
| Q8ND86 36-102    | HLS2       |
| Q8IX62 17-83     | HLS3       |
| Q9C0H0 138-201   | CON1       |
| Q9H094 236-298   | CON1       |
| Q8IX77 116-178   | CON1       |
| Q8IX71 95-158    | CON2       |
| 095877 28-94     | CON3       |
| Q8ND86 186-252   | CON3       |
